# Supplementary material for: Absorbable Hemostatic Agents Mimic Gossypiboma or Infected Collection on Imaging
Source: PubMed Central journal article supplement — Indian J Radiol Imaging. 2024 Apr 21;35(1):172–7. doi: 10.1055/s-0044-1781458 (PMC11651874; doi:10.1055/s-0044-1781458), 2024-04-21
Supplement: 10-1055-s-0044-1781458-s2392957.pdf [file 10-1055-s-0044-1781458-s2392957.pdf]

**Supplementary Table S1** Summary of the cases presented in our series

| No. | Surgery performed              | Patient age (y) | Day of postoperative imaging | Finding                                                                                  | Repeat imaging                                                        |
|-----|--------------------------------|-----------------|------------------------------|------------------------------------------------------------------------------------------|-----------------------------------------------------------------------|
| 1   | Aortic aneurysm repair         | 69              | 3                            | Mottled air lucencies adjacent to the graft                                              | Day 15: complete resolution                                           |
| 2   | Hysterectomy                   | 60              | 9                            | Collection containing irregularly shaped mottled air lucencies                           | Day 19: complete resolution                                           |
| 2   | Pelvic ganglioneuroma excision | 4               | 3                            | Loculated pelvic collection with ill-defined low-density areas and mottled air lucencies | Day 19: persistent collection with complete resolution of air pockets |
| 3   | Cesarean section               | 24              | 4                            | Rectangular low-density area with mottled air lucencies                                  | Exploratory laparotomy confirmed the presence of hemostatic material  |
